# Supplementary material
Source: PubMed Central journal article supplement (PMC1482665)

Percent growth

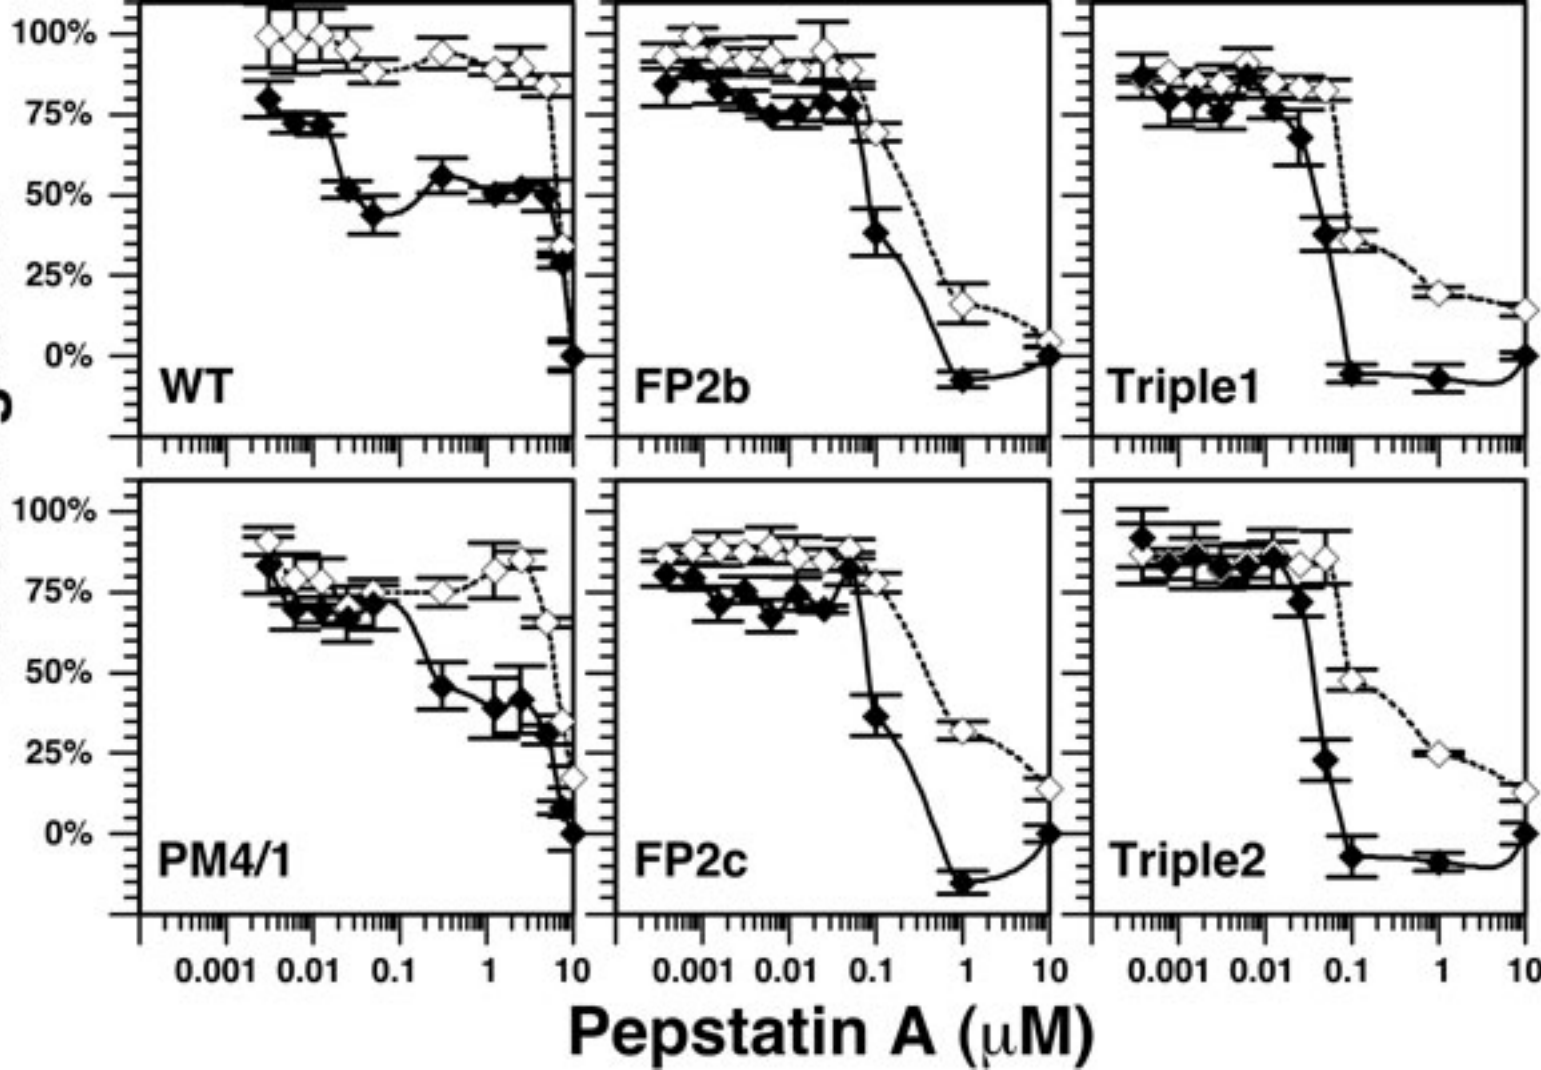

Supplement: pnas_0601876103_1.pdf [file pnas_0601876103_1.pdf]

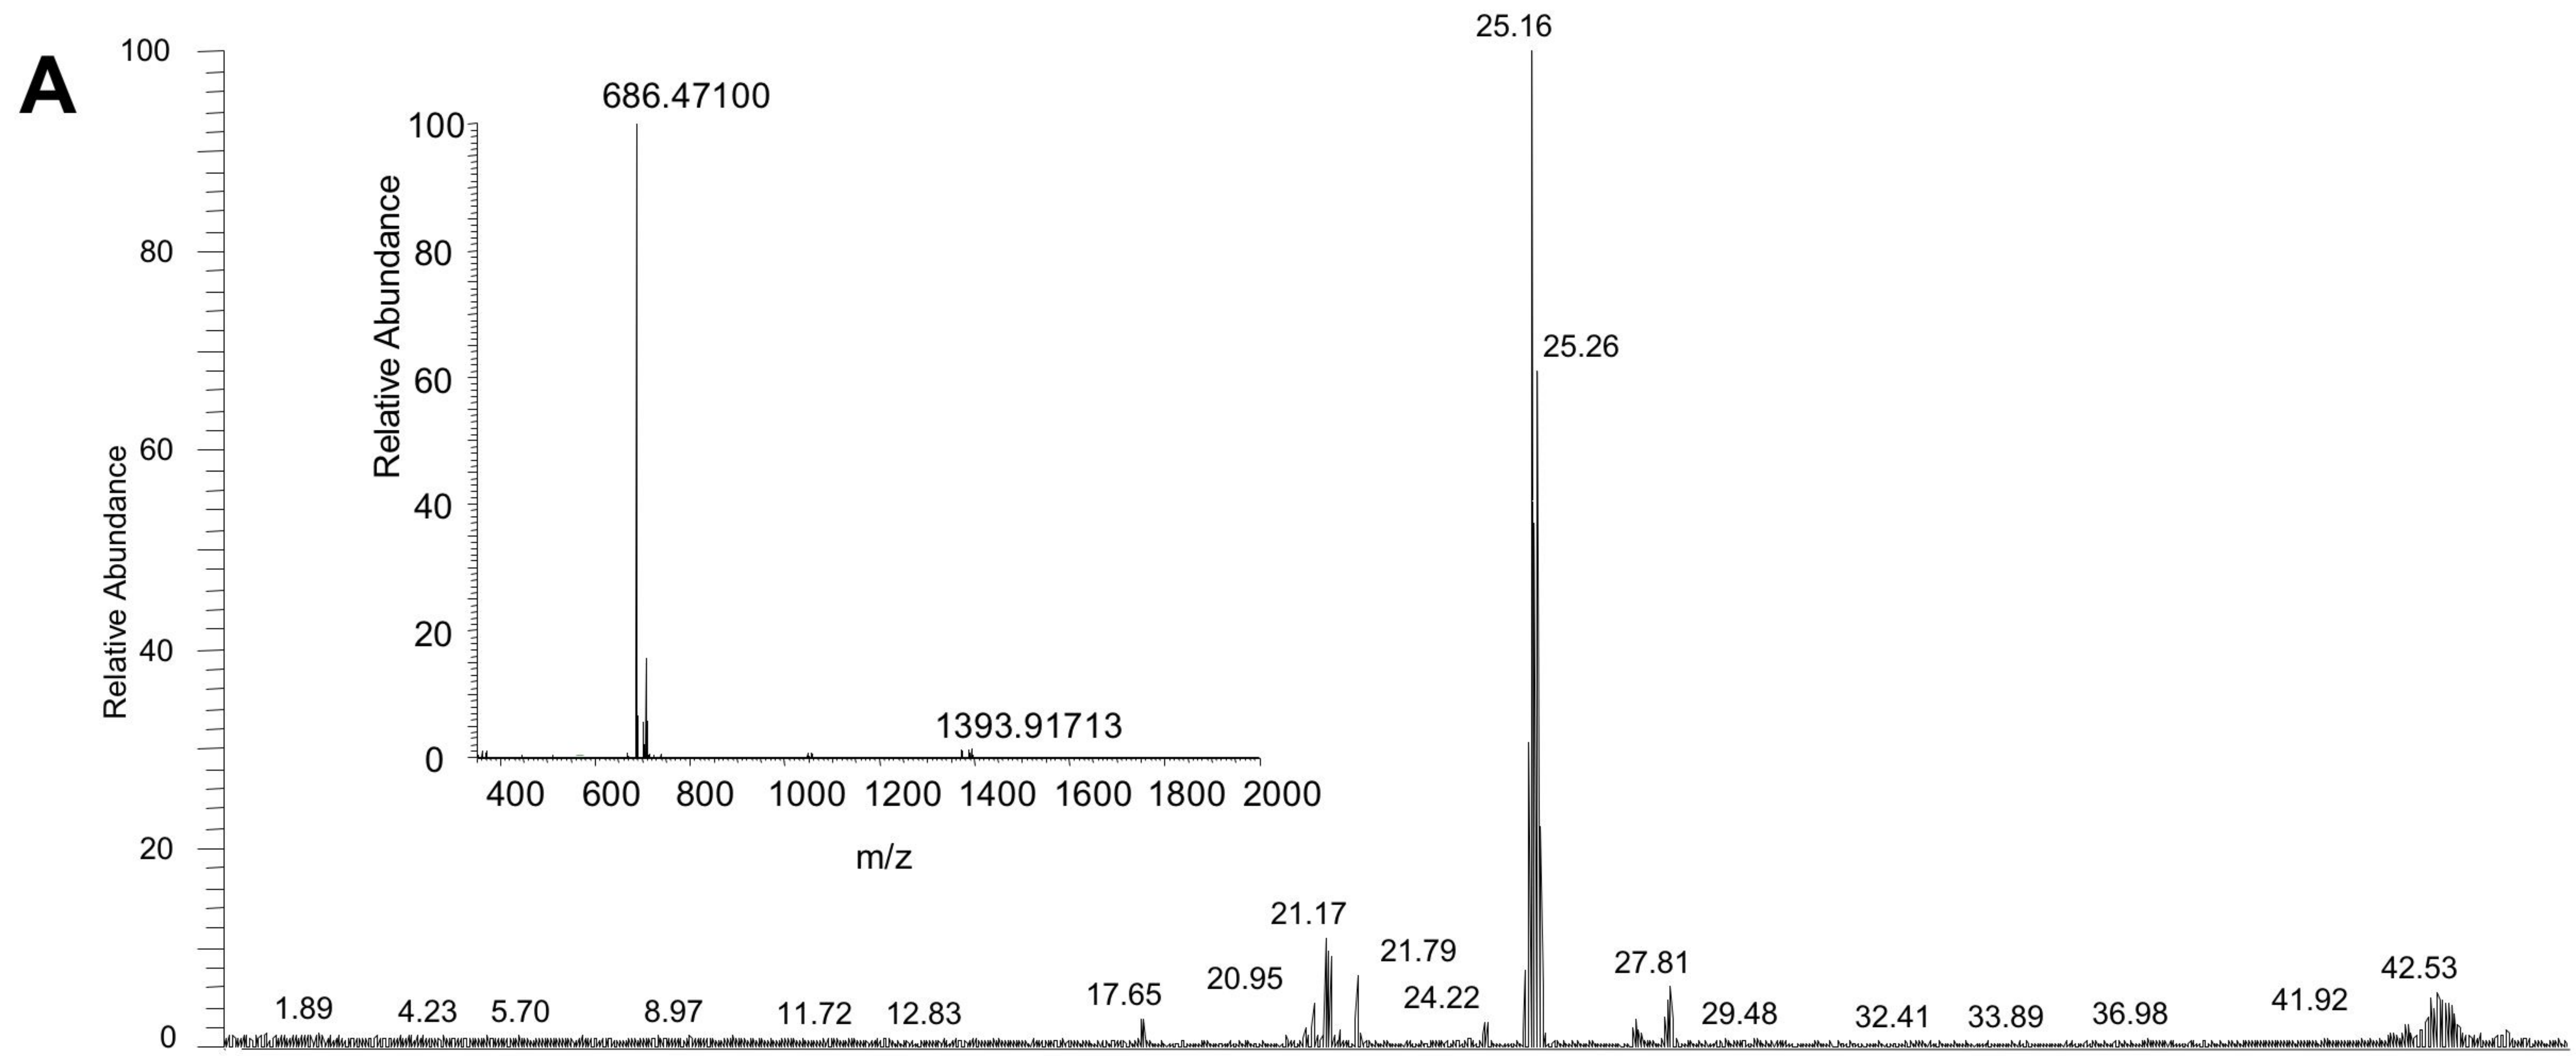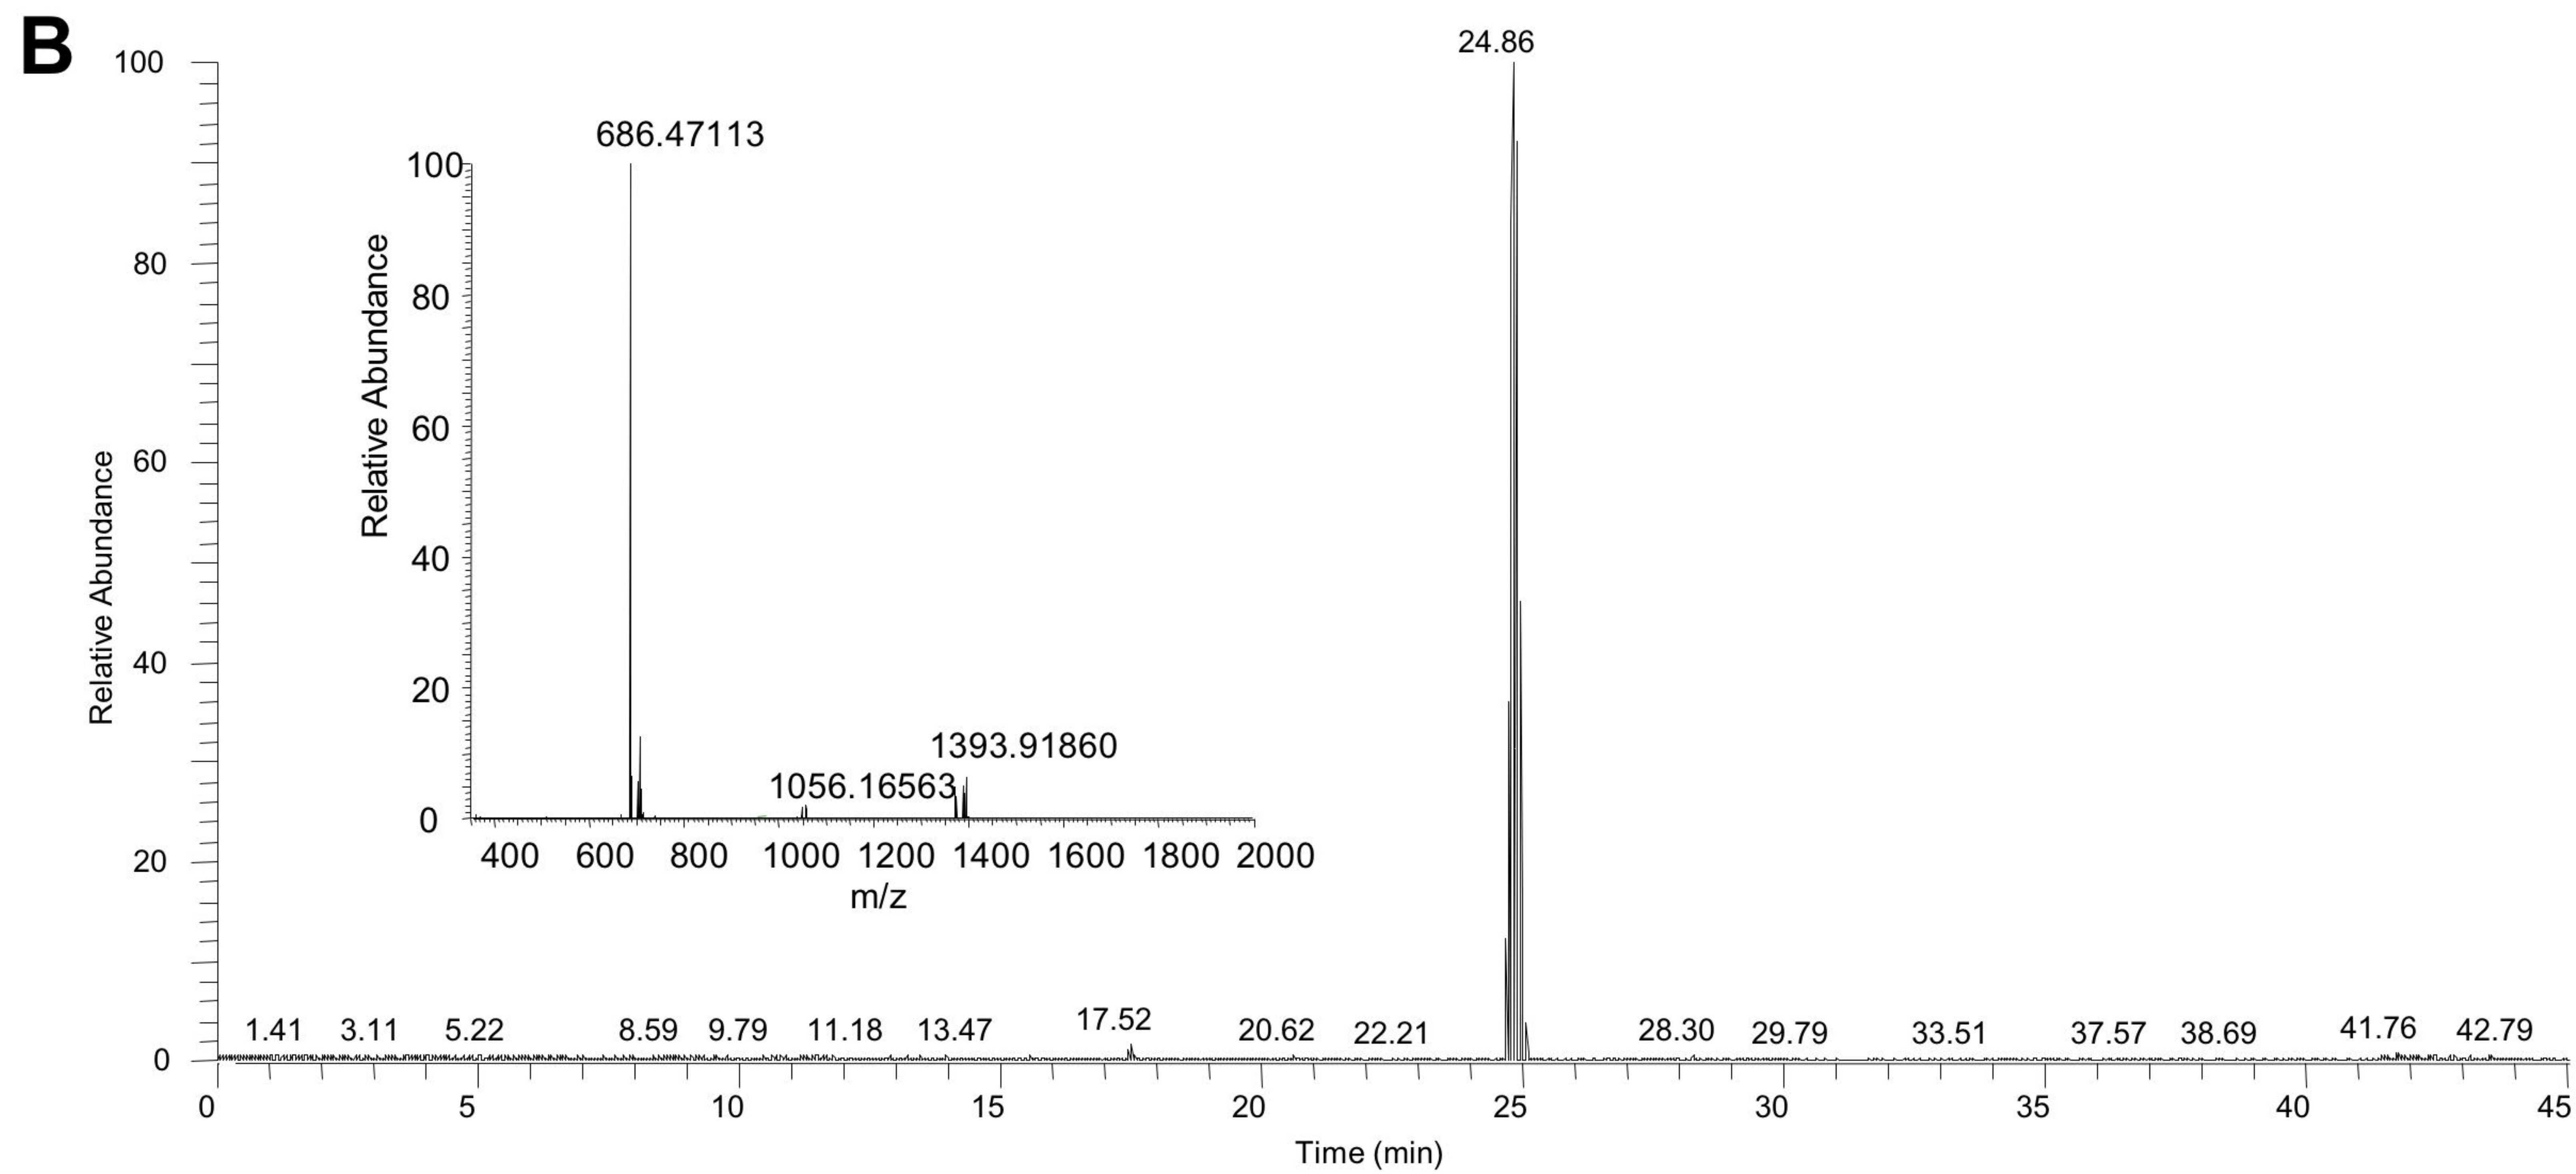

Supplement: pnas_0601876103_2.pdf [file pnas_0601876103_2.pdf]

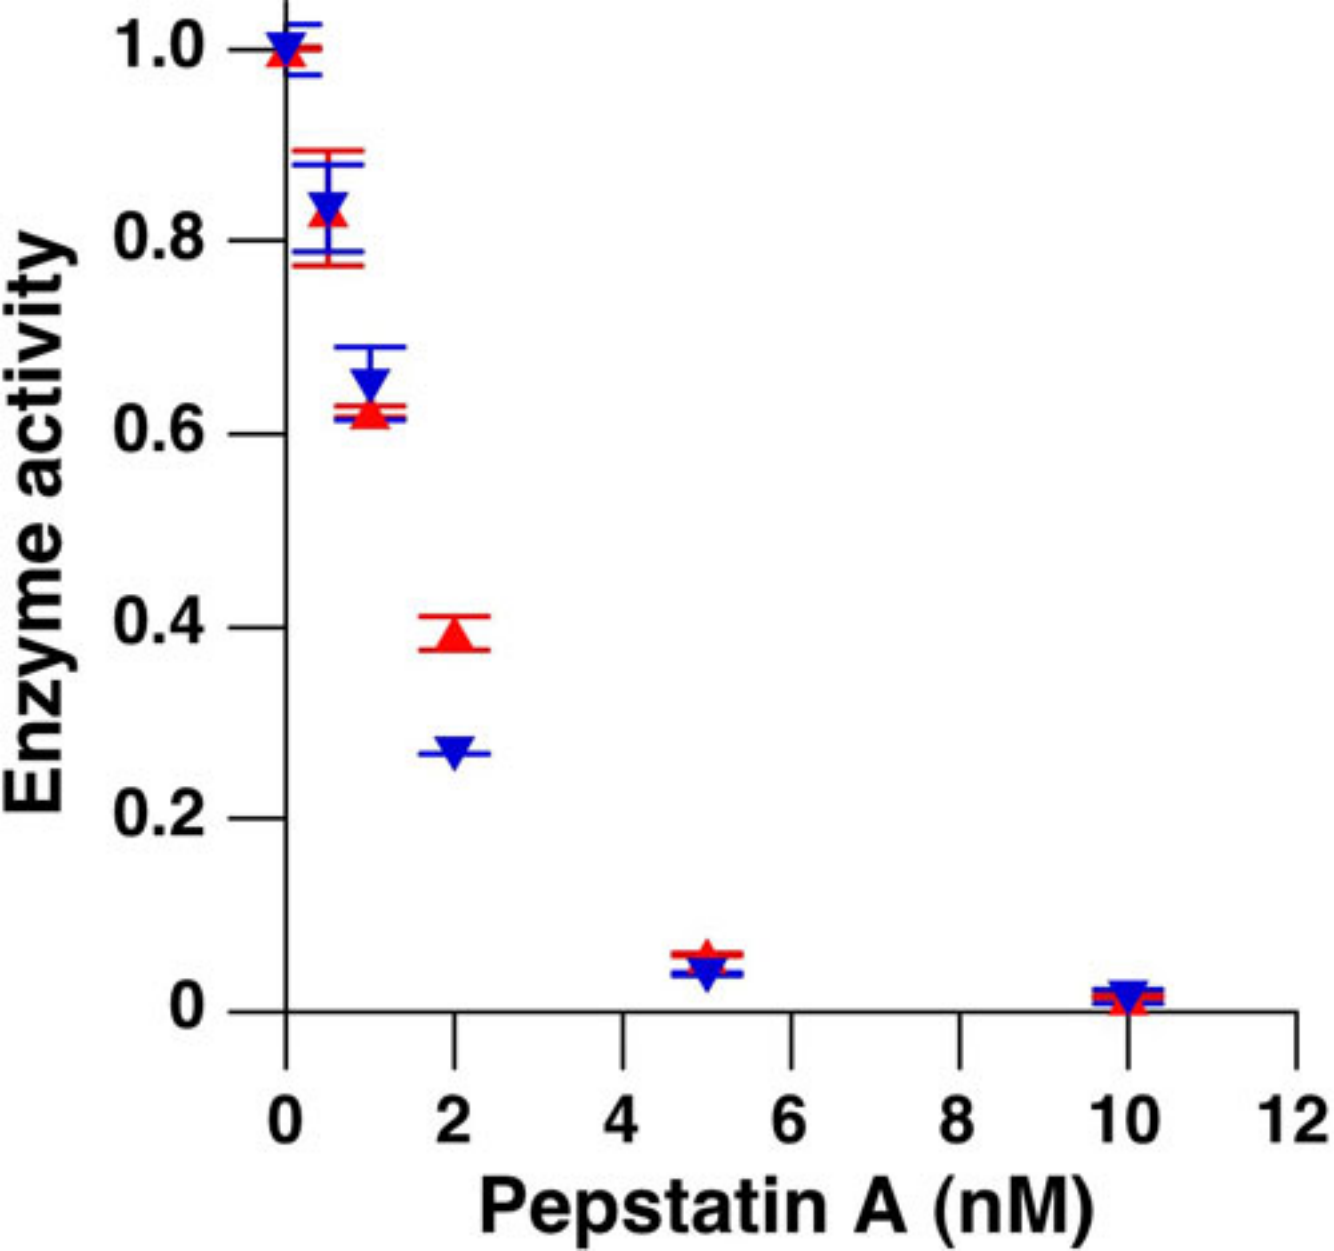

Supplement: pnas_0601876103_3.pdf [file pnas_0601876103_3.pdf]
